# Supplementary material for: Credibility, Accuracy, and Comprehensiveness of Internet-Based Information About Low Back Pain: A Systematic Review
Source: PubMed Central journal article supplement (PMC6529212; doi:10.2196/13357), 2019-05-07
Supplement: jmir_v21i5e13357_app1.pdf [file jmir_v21i5e13357_app1.pdf]

## Multimedia Appendix 1. Search terms employed on Google

| <b>Low back pain</b>                                                                       | <b><i>Sciatica</i></b>                                                                     |
|--------------------------------------------------------------------------------------------|--------------------------------------------------------------------------------------------|
| Australia ( <a href="http://www.google.com.au">www.google.com.au</a> )                     |                                                                                            |
| <b>Government:</b> low back pain Australia gov                                             | <b>Government:</b> low back pain Australia gov                                             |
| <b>NGOs:</b> low back pain Australia org                                                   | <b>NGOs:</b> low back pain Australia org                                                   |
| <b>Consumer organisations:</b> low back pain Australia consumer reports                    | <b>Consumer organisations:</b> low back pain Australia consumer reports                    |
| <b>Hospitals:</b> low back pain Australia hospital                                         | <b>Hospitals:</b> low back pain Australia hospital                                         |
| <b>Universities:</b> low back pain Australia university                                    | <b>Universities:</b> low back pain Australia university                                    |
| <b>Professional associations/societies:</b> low back pain Australia professional societies | <b>Professional associations/societies:</b> low back pain Australia professional societies |
| Canada ( <a href="http://www.google.ca">www.google.ca</a> )                                |                                                                                            |
| <b>Government:</b> low back pain Canada gov                                                | <b>Government:</b> low back pain Canada gov                                                |
| <b>NGOs:</b> low back pain Canada org                                                      | <b>NGOs:</b> low back pain Canada org                                                      |
| <b>Consumer organisations:</b> low back pain Canada consumer                               | <b>Consumer organisations:</b> low back pain Canada consumer                               |
| <b>Hospitals:</b> low back pain Canada hospital services                                   | <b>Hospitals:</b> low back pain Canada hospital services                                   |
| <b>Universities:</b> low back pain Canada university                                       | <b>Universities:</b> low back pain Canada university                                       |
| <b>Professional associations/societies:</b> low back pain Canada association society       | <b>Professional associations/societies:</b> low back pain Canada association society       |
| New Zealand ( <a href="http://www.google.co.nz">www.google.co.nz</a> )                     |                                                                                            |
| <b>Government:</b> low back pain New Zealand govt                                          | <b>Government:</b> low back pain New Zealand govt                                          |
| <b>NGOs:</b> low back pain New Zealand org                                                 | <b>NGOs:</b> low back pain New Zealand org                                                 |
| <b>Consumer organisations:</b> low back pain New Zealand consumer                          | <b>Consumer organisations:</b> low back pain New Zealand consumer                          |
| <b>Hospitals:</b> low back pain New Zealand hospital                                       | <b>Hospitals:</b> low back pain New Zealand hospital                                       |
| <b>Universities:</b> low back pain university ac.nz                                        | <b>Universities:</b> low back pain university ac.nz                                        |
| <b>Professional associations/societies:</b> low back pain New Zealand Society              | <b>Professional associations/societies:</b> low back pain New Zealand Society              |
| South Africa ( <a href="http://www.google.co.za">www.google.co.za</a> )                    |                                                                                            |
| <b>Government:</b> low back pain South Africa gov.za                                       | <b>Government:</b> sciatica pain South Africa gov.za                                       |

**NGOs:** low back pain South Africa org.za

**Consumer organisations:** low back pain Africa consumers

**Hospitals:** low back pain hospital Africa .za

**Universities:** low back pain South Africa university

**Professional associations/societies:** low back pain South Africa professional association

United Kingdom ([www.google.co.uk](http://www.google.co.uk))

**Government:** low back pain gov.uk

**NGOs:** low back pain uk org

**Consumer organisations:** low back pain uk consumer reports

**Hospitals:** low back pain uk hospital

**Universities:** low back pain uk university

**Professional associations/societies:** low back pain uk association society

United States ([www.google.com](http://www.google.com))

**Government:** low back pain .gov usa

**NGOs:** low back pain org usa

**Consumer organisations:** low back pain consumer usa

**Hospitals:** low back pain hospital usa

**Universities:** low back pain U.S university health services

**Professional associations/societies:** low back pain U.S association society

**NGOs:** sciatica South Africa org.za

**Consumer organisations:** sciatica Africa consumers

**Hospitals:** sciatica hospital Africa .za

**Universities:** sciatica South Africa university

**Professional associations/societies:** sciatica South Africa professional association

**Government:** low back pain gov.uk

**NGOs:** low back pain uk org

**Consumer organisations:** low back pain uk consumer reports

**Hospitals:** low back pain uk hospital

**Universities:** low back pain uk university

**Professional associations/societies:** low back pain uk association society

**Government:** low back pain .gov usa

**NGOs:** low back pain org usa

**Consumer organisations:** low back pain consumer usa

**Hospitals:** low back pain hospital usa

**Universities:** low back pain U.S university health services

**Professional associations/societies:** low back pain U.S association society

---
