# Supplementary material for: Credibility, Accuracy, and Comprehensiveness of Internet-Based Information About Low Back Pain: A Systematic Review
Source: PubMed Central journal article supplement (PMC6529212; doi:10.2196/13357), 2019-05-07
Supplement: jmir_v21i5e13357_app2.pdf [file jmir_v21i5e13357_app2.pdf]

**Multimedia Appendix 2.** Additional characteristics of the included websites (N = 79)

| Website                                    | Type of website                  | Condition                    | Presentation of content | JAMA benchmark                |                           |                    |                                                                |
|--------------------------------------------|----------------------------------|------------------------------|-------------------------|-------------------------------|---------------------------|--------------------|----------------------------------------------------------------|
|                                            |                                  |                              |                         | Updated after NICE Guidelines | Declaration of authorship | List of references | Disclosure of any conflict of interest, funding or sponsorship |
| <b>Australia</b>                           |                                  |                              |                         |                               |                           |                    |                                                                |
| Arthritis Australia                        | Non-governmental organisation    | Acute, persistent            | Booklet                 | No                            | Yes                       | No                 | Yes                                                            |
| Australian Pain Management Association     | Non-governmental organisation    | Radicular                    | Website                 | NR                            | No                        | No                 | NR                                                             |
| Australian Physiotherapy Association       | Professional society/association | Acute, persistent, radicular | Website                 | Yes                           | Yes                       | No                 | NR                                                             |
| Better Health Choice                       | Government Consumer organisation | Acute, persistent, radicular | Website                 | Yes                           | No                        | Yes                | NR                                                             |
|                                            |                                  | Acute, persistent            | Website                 | Yes                           | Yes                       | No                 | NR                                                             |
| Choosing Wisely Australia                  | Professional society/association | Acute                        | Website                 | No                            | No                        | No                 | NR                                                             |
| Chronic Pain Australia                     | Non-governmental organisation    | Acute                        | Fact sheet<br>Website   | NR                            | No                        | No                 | NR                                                             |
| Health Direct                              | Government                       | Acute, radicular             | Website                 | No                            | No                        | Yes                | NR                                                             |
| Health Queensland                          | Government                       | Acute                        | Fact sheet              | NR                            | No                        | No                 | NR                                                             |
| Healthy Western Australia                  | Government                       | Acute, persistent            | Brochure                | No                            | No                        | No                 | NR                                                             |
| Musculoskeletal Australia                  | Consumer organisation            | Acute, persistent, radicular | Website                 | Yes                           | No                        | No                 | NR                                                             |
| South Australia Government                 | Government                       | Acute, radicular             | Fact sheet              | No                            | No                        | Yes                | NR                                                             |
| Tasmania Government                        | Government                       | Acute                        | Booklet                 | No                            | Yes                       | No                 | NR                                                             |
| <b>Canada</b>                              |                                  |                              |                         |                               |                           |                    |                                                                |
| Choosing Wisely Canada                     | Professional society/association | Acute                        | Website                 | NR                            | No                        | No                 | NR                                                             |
| HealthLinkBC (British Columbia Government) | Government                       | Radicular                    | Website                 | Yes                           | Yes                       | No                 | NR                                                             |
| Institute of Health Economics (IHE)        | Government                       | Acute, persistent            | Booklet                 | No                            | No                        | No                 | NR                                                             |
| <b>New Zealand</b>                         |                                  |                              |                         |                               |                           |                    |                                                                |
| Choosing wisely New Zealand                | Professional society/association | Acute                        | Website                 | NR                            | No                        | Yes                | NR                                                             |

| <b>South Africa</b>                               |                                  |                              |         |     |     |     |    |
|---------------------------------------------------|----------------------------------|------------------------------|---------|-----|-----|-----|----|
| Department of Health                              | Government                       | Acute                        | Website | Yes | No  | No  | NR |
| <b>The United Kingdom</b>                         |                                  |                              |         |     |     |     |    |
| Arthritis Research UK                             | Non-Governmental organisation    | Acute, persistent            | Booklet | No  | No  | Yes | NR |
| Barts Health                                      | Hospital                         | Acute                        | Booklet | Yes | No  | Yes | NR |
| British Association of Spine Surgeons (BASS)      | Professional society/association | Acute                        | Website | No  | No  | No  | NR |
| East Lancashire Hospital                          | Hospital                         | Acute, Persistent            | Booklet | Yes | No  | No  | NR |
| Focus on Disability                               | Non-Governmental organisation    | Radicular                    | Website | NR  | No  | No  | NR |
| Guy's and Saint Thomas'                           | Government                       | Radicular                    | Leaflet | Yes | No  | No  | NR |
| Hampshire County Council                          | Government                       | Acute                        | Booklet | NR  | No  | No  | NR |
| Health and Safety Executive                       | Government                       | Acute                        | Website | NR  | No  | No  | NR |
| Healthshare (Oxfordshire)                         | Non-Governmental organisation    | Acute, Persistent, radicular | Website | NR  | No  | No  | NR |
| Ipswich Hospital                                  | Hospital                         | Acute                        | Booklet | Yes | No  | Yes | NR |
| NHS Choices                                       | Government                       | Acute, radicular             | Website | Yes | No  | No  | NR |
| NHS Direct Wales                                  | Government                       | Radicular                    | Website | Yes | No  | No  | NR |
| NiDirect                                          | Government                       | Acute                        | Website | Yes | No  | No  | NR |
| Oxford University Hospitals                       | Hospital                         | Acute                        | Booklet | No  | No  | No  | NR |
| Poole Hospital                                    | Hospital                         | Acute, persistent, radicular | Booklet | Yes | Yes | Yes | NR |
| Queen Victoria Hospital                           | Hospital                         | Persistent                   | Booklet | No  | No  | No  | NR |
| Royal Berkshire ED patient sheet                  | Hospital                         | Acute, persistent            | Booklet | Yes | No  | Yes | NR |
| The University of Nottingham Health Service       | University                       | Acute                        | Website | NR  | Yes | No  | NR |
| York Teaching Hospital                            | Hospital                         | Acute                        | Website | NR  | No  | No  | NR |
| <b>The United States</b>                          |                                  |                              |         |     |     |     |    |
| Agency for Healthcare Research and Quality (AHRQ) | Government                       | Acute, persistent            | Website | Yes | Yes | Yes | NR |
| American Academy of Family Physicians             | Professional society/association | Acute                        | Website | Yes | No  | No  | NR |
| American Chronic Pain Association                 | Non-governmental organisation    | Acute, persistent, radicular | Booklet | No  | Yes | No  | NR |

|                                                                               |                                  |                              |         |     |     |     |     |
|-------------------------------------------------------------------------------|----------------------------------|------------------------------|---------|-----|-----|-----|-----|
| American Physical Therapy Association (APTA)                                  | Professional society/association | Acute, radicular             | Website | No  | No  | Yes | NR  |
| Beaumont Hospital                                                             | Hospital                         | Radicular                    | Website | NR  | No  | No  | NR  |
| Cedars-Sinai                                                                  | Hospital                         | Acute, persistent, radicular | Website | NR  | No  | No  | NR  |
| Cleveland Clinic                                                              | Hospital                         | Acute, persistent, radicular | Website | Yes | No  | Yes | NR  |
| Columbia Spine Hospital                                                       | Hospital                         | Radicular                    | Website | NR  | No  | No  | NR  |
| El Camino Hospital                                                            | Hospital                         | Acute, radicular             | Website | NR  | No  | No  | NR  |
| Emory Healthcare                                                              | Hospital                         | Radicular                    | Website | NR  | No  | No  | NR  |
| Hospital for Special Surgery (HSS)                                            | Hospital                         | Acute, persistent, radicular | Website | No  | Yes | Yes | Yes |
| International Association of Firefighters                                     | Non-governmental organisation    | Acute                        | Website | NR  | No  | No  | NR  |
| Johns Hopkins University                                                      | Hospital                         | Acute, persistent            | Website | NR  | No  | No  | NR  |
| Massachusetts General Hospital                                                | Hospital                         | Unclear                      | Website | NR  | No  | No  | NR  |
| Mayo Clinic                                                                   | Hospital                         | Acute, persistent, radicular | Website | NR  | No  | No  | NR  |
| MedlinePlus                                                                   | Government                       | Acute, persistent            | Website | No  | Yes | Yes | NR  |
| Mount Sinai Hospital                                                          | Hospital                         | Radicular                    | Website | NR  | No  | No  | NR  |
| National Center for Complementary and Integrative Health (NCCIH)              | Government                       | Persistent                   | Website | No  | Yes | Yes | NR  |
| National Institute of Arthritis and Musculoskeletal and Skin Diseases (NIAMS) | Government                       | Acute, persistent            | Website | No  | No  | No  | NR  |
| National Institute of Neurological Disorders and Stroke (NINDS)               | Government                       | Acute, persistent            | Website | Yes | No  | No  | NR  |
| New England Baptist Hospital                                                  | Hospital                         | Acute, radicular             | Website | NR  | No  | No  | NR  |
| North America Spine Surgeons Society (NASS)                                   | Professional society/association | Acute                        | Booklet | No  | Yes | No  | NR  |
| Oregon Health & Sciencex'                                                     | University                       | Radicular                    | Website | NR  | No  | No  | NR  |
| Penn Medicine                                                                 | Hospital                         | Acute, radicular             | Website | Yes | Yes | Yes | NR  |
| Rush Hospital                                                                 | Hospital                         | Radicular                    | Website | NR  | No  | NO  | NR  |
| SSM Health                                                                    | Hospital                         | Radicular                    | Website | NR  | No  | No  | NR  |

|                                             |            |                              |         |     |     |     |     |
|---------------------------------------------|------------|------------------------------|---------|-----|-----|-----|-----|
| St Lukes                                    | Hospital   | Acute, persistent            | Website | Yes | Yes | Yes | Yes |
| University of Minnesota<br>medical Center   | Hospital   | Radicular                    | Website | NR  | No  | No  | NR  |
| University of Berkeley                      | University | Acute                        | Website | NR  | No  | No  | NR  |
| University of California                    | University | Acute                        | Website | NR  | No  | No  | NR  |
| University of Florida Health                | Hospital   | Persistent                   | Website | Yes | Yes | Yes | NR  |
| University of Kansas                        | Hospital   | Persistent                   | Website | NR  | No  | No  | NR  |
| University of Miami<br>hospital and clinics | University | Radicular                    | Website | NR  | No  | No  | NR  |
| University of Michigan                      | University | Radicular                    | Website | Yes | Yes | Yes | Yes |
| University of Notre Dame                    | University | Acute                        | Leaflet | No  | No  | No  | NR  |
| University of Rochester<br>Medical Center   | Hospital   | Radicular                    | Website | NR  | No  | No  | NR  |
| University of Stanford<br>health Care       | Hospital   | Radicular                    | Website | NR  | No  | No  | NR  |
| University of Utah Health                   | Hospital   | Acute, persistent, radicular | Website | NR  | No  | No  | NR  |
| University of Vermont<br>medical center     | Hospital   | Acute, persistent, radicular | Website | Yes | No  | No  | NR  |
| University of Virginia<br>health system     | Hospital   | Radicular                    | Website | NR  | No  | No  | NR  |
| University of Winsconsin<br>health          | Hospital   | Acute, persistent, radicular | Website | Yes | Yes | No  | Yes |
| Winchester Hospital                         | Hospital   | Radicular                    | Website | NR  | No  | Yes | NR  |

NR, not reported;
