# Supplementary material for: Credibility, Accuracy, and Comprehensiveness of Internet-Based Information About Low Back Pain: A Systematic Review
Source: PubMed Central journal article supplement (PMC6529212; doi:10.2196/13357), 2019-05-07
Supplement: jmir_v21i5e13357_app4.pdf [file jmir_v21i5e13357_app4.pdf]

**Multimedia Appendix 4.** Frequency (%) of websites endorsing or dismissing treatments mentioned in guidelines for persistent low back pain (N=29)

| Treatment                                             | Appropriate endorsement | Inappropriate endorsement | Appropriate dismissal | Inappropriate dismissal | Unclear recommendation | Omissions |
|-------------------------------------------------------|-------------------------|---------------------------|-----------------------|-------------------------|------------------------|-----------|
| <b>Treatments endorsed by at least one guideline</b>  |                         |                           |                       |                         |                        |           |
| Advice to stay active                                 | 12 (41.3)               | -                         | -                     | 0 (0)                   | 1 (3.4)                | 16 (55.2) |
| Behavioural (operant) therapy                         | 2 (6.9)                 | -                         | -                     | 0 (0)                   | 0 (0)                  | 27 (93.1) |
| Cognitive behavioural therapy                         | 6 (20.7)                | -                         | -                     | 0 (0)                   | 0 (0)                  | 23 (79.3) |
| Education                                             | 8 (27.6)                | -                         | -                     | 0 (0)                   | 1 (3.4)                | 20 (68.9) |
| Exercise                                              | 23 (79.3)               | -                         | -                     | 1 (3.4)                 | 2 (6.9)                | 3 (10.3)  |
| Low level laser therapy                               | 0 (0)                   | -                         | -                     | 1 (3.4)                 | 1 (3.4)                | 27 (93.1) |
| Massage                                               | 12 (41.3)               | -                         | -                     | 0 (0)                   | 4 (13.8)               | 13 (44.8) |
| Mindfulness                                           | 1 (3.4)                 | -                         | -                     | 1 (3.4)                 | 0 (0)                  | 27 (93.1) |
| Multidisciplinary treatment                           | 10 (34.4)               | -                         | -                     | 0 (0)                   | 0 (0)                  | 19 (65.5) |
| Non-steroidal anti-inflammatory                       | 14 (48.3)               | -                         | -                     | 0 (0)                   | 3 (10.3)               | 12 (41.3) |
| Progressive relaxation                                | 5 (17.2)                | -                         | -                     | 0 (0)                   | 0 (0)                  | 24 (82.8) |
| Radiofrequency denervation                            | 2 (6.9)                 | -                         | -                     | 0 (0)                   | 0 (0)                  | 27 (93.1) |
| Spinal manipulative therapy                           | 11 (37.9)               | -                         | -                     | 1 (3.4)                 | 6 (20.7)               | 11 (37.9) |
| Tai Chi                                               | 2 (6.9)                 | -                         | -                     | 0 (0)                   | 0 (0)                  | 27 (93.1) |
| Yoga                                                  | 8 (27.6)                | -                         | -                     | 0 (0)                   | 3 (10.3)               | 18 (62.1) |
| <b>Treatments dismissed by at least one guideline</b> |                         |                           |                       |                         |                        |           |
| Antidepressants (tricyclic)                           | -                       | 4 (13.8)                  | 3 (10.3)              | -                       | 6 (20.7)               | 16 (55.2) |
| Benzodiazepines                                       | -                       | 1 (3.4)                   | 0 (0)                 | -                       | 1 (3.4)                | 27 (93.1) |
| Epidural corticosteroid injection                     | -                       | 3 (10.3)                  | 0 (0)                 | -                       | 8 (27.6)               | 18 (62.1) |
| Facet joint corticosteroid injection                  | -                       | 2 (6.9)                   | 0 (0)                 | -                       | 9 (31.0)               | 18 (62.1) |
| Kinesio taping                                        | -                       | 0 (0)                     | 0 (0)                 | -                       | 0 (0)                  | 29 (100)  |
| Opioids (any)                                         | -                       | 9 (31.0)                  | 2 (6.9)               | -                       | 3 (10.3)               | 15 (51.7) |
| Paracetamol                                           | -                       | 6 (20.7)                  | 2 (6.9)               | -                       | 4 (13.8)               | 17 (58.6) |
| Spinal fusion                                         | -                       | 4 (13.8)                  | 3 (10.3)              | -                       | 6 (20.7)               | 16 (55.2) |
| TENS                                                  | -                       | 2 (6.9)                   | 2 (6.9)               | -                       | 5 (17.2)               | 20 (68.9) |
| Ultrasound                                            | -                       | 1 (3.4)                   | 2 (6.9)               | -                       | 1 (3.4)                | 25 (86.2) |
| <b>Conflicting recommendations</b>                    |                         |                           |                       |                         |                        |           |
| Acupuncture                                           | -                       | 17 (58.6)                 | -                     | -                       | 2 (6.9)                | 10 (34.4) |

Some values may not add up to 100% due to rounding
