# Supplementary material for: Credibility, Accuracy, and Comprehensiveness of Internet-Based Information About Low Back Pain: A Systematic Review
Source: PubMed Central journal article supplement (PMC6529212; doi:10.2196/13357), 2019-05-07
Supplement: jmir_v21i5e13357_app5.pdf [file jmir_v21i5e13357_app5.pdf]

**Supplementary file 5.** Frequency (%) of websites endorsing or dismissing treatments mentioned in guidelines for radicular low back pain (n= 39)

| Treatment                                             | Appropriate endorsement | Inappropriate endorsement | Appropriate dismissal | Inappropriate dismissal | Unclear recommendation | Omissions |
|-------------------------------------------------------|-------------------------|---------------------------|-----------------------|-------------------------|------------------------|-----------|
| <b>Treatments endorsed by at least one guideline</b>  |                         |                           |                       |                         |                        |           |
| Advice to stay active                                 | 18 (46.1)               | -                         | -                     | 0 (0)                   | 1 (2.5)                | 20 (51.2) |
| Antidepressant (Duloxetine)                           | 1 (2.5)                 | -                         | -                     | 0 (0)                   | 0 (0)                  | 38 (97.4) |
| Exercise                                              | 24 (61.5)               | -                         | -                     | 0 (0)                   | 0 (0)                  | 15 (38.4) |
| Epidural corticosteroid injection                     | 13 (33.3)               | -                         | -                     | 1 (2.5)                 | 9 (23.1)               | 16 (41.0) |
| Gabapentin                                            | 6 (15.4)                | -                         | -                     | 0 (0)                   | 1 (2.5)                | 32 (82.0) |
| Multidisciplinary treatment                           | 0 (0)                   | -                         | -                     | 0 (0)                   | 0 (0)                  | 39 (100)  |
| Opioid (only as acute rescue)                         | 0 (0)                   | -                         | -                     | 0 (0)                   | 4 (10.2)               | 35 (89.7) |
| Pregabalin                                            | 5 (12.8)                | -                         | -                     | 0 (0)                   | 1 (2.5)                | 33 (84.6) |
| Spinal manipulative therapy                           | 4 (10.2)                | -                         | -                     | 0 (0)                   | 1 (2.5)                | 34 (87.1) |
| Spinal decompression                                  | 15 (38.4)               | -                         | -                     | 1 (2.5)                 | 2 (5.1)                | 21 (53.8) |
| <b>Treatments dismissed by at least one guideline</b> |                         |                           |                       |                         |                        |           |
| Acupuncture                                           | -                       | 6 (15.4)                  | 0 (0)                 | -                       | 0 (0)                  | 33 (84.6) |
| Benzodiazepines (Diazepam)                            | -                       | 2 (5.1)                   | 0 (0)                 | -                       | 0 (0)                  | 37 (94.8) |
| Systemic corticosteroids                              | -                       | 2 (5.1)                   | 1 (2.5)               | -                       | 0 (0)                  | 36 (92.3) |
| Traction                                              | -                       | 3 (7.7)                   | 1 (2.5)               | -                       | 0 (0)                  | 35 (89.7) |
| <b>Conflicting recommendations</b>                    |                         |                           |                       |                         |                        |           |
| Antidepressant (Amitriptyline)                        | -                       | 4 (10.2)                  | 0 (0)                 | -                       | 0 (0)                  | 35 (89.7) |

*Some values may not add up to 100% due to rounding*

*\*Prescribing opioids was considered appropriate only as acute rescue – the smallest dose for the shortest period*
