# Supplementary material for: Credibility, Accuracy, and Comprehensiveness of Internet-Based Information About Low Back Pain: A Systematic Review
Source: PubMed Central journal article supplement (PMC6529212; doi:10.2196/13357), 2019-05-07
Supplement: jmir_v21i5e13357_app6.pdf [file jmir_v21i5e13357_app6.pdf]

**Multimedia Appendix 6.** Accuracy and comprehensiveness of website recommendations

| Website                                           | Total no of recommendations given by the website | AE | IE | AD | ID | UNC | END | DIS | No of clear accurate recommendations | No of recommendations from guidelines correctly covered by the website (%) |
|---------------------------------------------------|--------------------------------------------------|----|----|----|----|-----|-----|-----|--------------------------------------|----------------------------------------------------------------------------|
| <b><i>Acute LBP</i></b>                           |                                                  |    |    |    |    |     |     |     |                                      |                                                                            |
| Arthritis Australia                               | 19                                               | 4  | 3  | 1  | 0  | 9   | 1   | 1   | 6                                    | 5 (35.7%)                                                                  |
| Australia Physiotherapy Association               | 6                                                | 4  | 0  | 1  | 1  | 0   | 0   | 0   | 5                                    | 5 35.7%)                                                                   |
| Better Health (Victoria Government)               | 1                                                | 1  | 0  | 0  | 0  | 0   | 0   | 0   | 1                                    | 1 (7.1%)                                                                   |
| Choice                                            | 18                                               | 4  | 2  | 2  | 0  | 9   | 1   | 0   | 6                                    | 6 (42.9%)                                                                  |
| Choosing Wisely Australia                         | 7                                                | 2  | 1  | 1  | 0  | 0   | 3   | 0   | 3                                    | 3 (21.4%)                                                                  |
| Chronic Pain Australia                            | 6                                                | 2  | 1  | 2  | 0  | 0   | 0   | 1   | 5                                    | 4 (28.6%)                                                                  |
| Health Direct                                     | 13                                               | 5  | 2  | 0  | 1  | 3   | 1   | 1   | 6                                    | 5 (35.7%)                                                                  |
| Health Queensland (Queensland government)         | 6                                                | 3  | 0  | 0  | 2  | 0   | 1   | 0   | 3                                    | 3 (21.4%)                                                                  |
| Healthy WA (Western Australia Government)         | 6                                                | 3  | 1  | 1  | 0  | 0   | 1   | 0   | 4                                    | 4 (28.6%)                                                                  |
| Musculoskeletal Australia                         | 8                                                | 4  | 0  | 1  | 0  | 1   | 2   | 0   | 5                                    | 5 (35.7%)                                                                  |
| South Australia Government                        | 3                                                | 2  | 0  | 1  | 0  | 0   | 0   | 0   | 3                                    | 3 (21.4%)                                                                  |
| Tasmania Government                               | 7                                                | 3  | 1  | 1  | 0  | 0   | 2   | 0   | 4                                    | 4 (28.6%)                                                                  |
| Acute_Institute of Health Economics (IHE)         | 31                                               | 6  | 3  | 2  | 0  | 14  | 1   | 5   | 6                                    | 6 (42.9%)                                                                  |
| Choosing Wisely Canada                            | 9                                                | 5  | 0  | 1  | 0  | 0   | 3   | 0   | 13                                   | 8 (57.1%)                                                                  |
| Choosing Wisely New Zealand                       | 5                                                | 2  | 1  | 0  | 0  | 0   | 2   | 0   | 2                                    | 2 (14.3%)                                                                  |
| Department of Health - South Africa               | 12                                               | 5  | 1  | 0  | 1  | 0   | 3   | 2   | 7                                    | 5 (35.7%)                                                                  |
| Arthritis Research UK                             | 18                                               | 0  | 0  | 0  | 0  | 18  | 0   | 0   | 0                                    | 0 (0.0%)                                                                   |
| Barts Health - NHS Trust                          | 7                                                | 5  | 1  | 0  | 0  | 0   | 1   | 0   | 5                                    | 5 (35.7%)                                                                  |
| British Association of Spine Surgeons (BASS)      | 5                                                | 2  | 2  | 1  | 0  | 0   | 0   | 0   | 3                                    | 3 (21.4%)                                                                  |
| East Lancashire Hospital                          | 7                                                | 4  | 1  | 1  | 0  | 0   | 1   | 0   | 5                                    | 5 (35.7%)                                                                  |
| Hampshire County Council                          | 4                                                | 2  | 0  | 1  | 0  | 0   | 1   | 0   | 3                                    | 3 (21.4%)                                                                  |
| Health and Safety Executive                       | 5                                                | 4  | 0  | 0  | 0  | 0   | 1   | 0   | 4                                    | 4 (28.6%)                                                                  |
| Healthshare (Oxfordshire)                         | 3                                                | 2  | 0  | 1  | 0  | 0   | 0   | 0   | 3                                    | 3 (21.4%)                                                                  |
| Ipswich Hospital                                  | 4                                                | 3  | 0  | 0  | 0  | 0   | 1   | 0   | 3                                    | 3 (21.4%)                                                                  |
| NHS Choices                                       | 8                                                | 6  | 0  | 0  | 0  | 0   | 2   | 0   | 6                                    | 6 (42.9%)                                                                  |
| NiDirect                                          | 6                                                | 4  | 1  | 1  | 0  | 0   | 0   | 0   | 5                                    | 5 (35.7%)                                                                  |
| Oxford University Hospitals                       | 3                                                | 2  | 0  | 0  | 0  | 0   | 1   | 0   | 2                                    | 2 (14.3%)                                                                  |
| Poole Hospital                                    | 12                                               | 5  | 4  | 1  | 0  | 0   | 2   | 0   | 6                                    | 6 (42.9%)                                                                  |
| Royal Berkshire Hospital                          | 6                                                | 4  | 1  | 0  | 0  | 0   | 1   | 0   | 4                                    | 4 (28.6%)                                                                  |
| The University of Nottingham Health Service       | 7                                                | 4  | 2  | 0  | 0  | 0   | 1   | 0   | 4                                    | 4 (28.6%)                                                                  |
| York Teaching Hospital                            | 4                                                | 3  | 1  | 0  | 0  | 0   | 0   | 0   | 3                                    | 3 (21.4%)                                                                  |
| Agency for Healthcare Research and Quality (AHRQ) | 5                                                | 4  | 0  | 1  | 0  | 0   | 0   | 0   | 5                                    | 5 (35.7%)                                                                  |

|                                                                               |    |   |   |   |   |    |   |   |    |   |         |
|-------------------------------------------------------------------------------|----|---|---|---|---|----|---|---|----|---|---------|
| American Academy of Family Physicians                                         | 7  | 5 | 1 | 0 | 0 | 0  | 1 | 0 | 5  | 5 | (35.7%) |
| American Chronic Pain Association                                             | 13 | 3 | 1 | 0 | 0 | 9  | 0 | 0 | 3  | 3 | (21.4%) |
| American Physical Therapy Association (APTA)                                  | 8  | 5 | 0 | 1 | 0 | 0  | 2 | 0 | 6  | 6 | (42.9%) |
| Cedars-Sinai                                                                  | 6  | 4 | 1 | 0 | 0 | 0  | 1 | 0 | 4  | 4 | (28.6%) |
| Cleveland Clinic                                                              | 5  | 3 | 1 | 0 | 0 | 0  | 1 | 0 | 3  | 3 | (21.4%) |
| El Camino Hospital                                                            | 5  | 1 | 0 | 0 | 0 | 0  | 4 | 0 | 1  | 1 | (7.1%)  |
| Hospital for Special Surgery (HSS)                                            | 12 | 4 | 2 | 1 | 0 | 0  | 5 | 0 | 5  | 5 | (35.7%) |
| International association of firefighters                                     | 8  | 5 | 1 | 1 | 0 | 0  | 1 | 0 | 6  | 6 | (42.9%) |
| Johns Hopkins Medicine                                                        | 4  | 2 | 1 | 0 | 1 | 0  | 0 | 0 | 2  | 2 | (14.3%) |
| Mayo Clinic                                                                   | 17 | 3 | 0 | 1 | 0 | 12 | 1 | 0 | 4  | 4 | (28.6%) |
| MedlinePLus                                                                   | 6  | 4 | 1 | 1 | 0 | 0  | 0 | 0 | 5  | 5 | (35.7%) |
| National Institute of Arthritis and Musculoskeletal and Skin Diseases (NIAMS) | 5  | 2 | 1 | 0 | 1 | 0  | 0 | 1 | 3  | 2 | (14.3%) |
| National Institute of Neurological Disorders and Stroke (NINDS)               | 13 | 4 | 3 | 1 | 0 | 3  | 2 | 0 | 5  | 5 | (35.7%) |
| New England Baptist Hospital                                                  | 8  | 4 | 2 | 0 | 0 | 0  | 2 | 0 | 4  | 4 | (28.6%) |
| North American Spine Society (NASS)                                           | 10 | 5 | 1 | 1 | 0 | 2  | 1 | 0 | 6  | 6 | (42.9%) |
| Penn Medicine                                                                 | 6  | 2 | 0 | 1 | 1 | 0  | 2 | 0 | 3  | 3 | (21.4%) |
| St Lukes                                                                      | 12 | 3 | 0 | 0 | 0 | 8  | 1 | 0 | 3  | 3 | (21.4%) |
| University of Berkeley                                                        | 4  | 2 | 0 | 0 | 1 | 0  | 1 | 0 | 2  | 2 | (14.3%) |
| University of Davis - California                                              | 7  | 5 | 1 | 0 | 0 | 0  | 1 | 0 | 5  | 5 | (35.7%) |
| University of Notre Dame                                                      | 7  | 3 | 2 | 0 | 1 | 0  | 1 | 0 | 3  | 3 | (21.4%) |
| University of Utah                                                            | 14 | 4 | 3 | 1 | 0 | 4  | 2 | 0 | 5  | 5 | (35.7%) |
| University of Vermont medical center                                          | 6  | 2 | 1 | 0 | 0 | 2  | 1 | 0 | 2  | 2 | (28.6%) |
| University of Winsconsin                                                      | 8  | 3 | 0 | 0 | 0 | 4  | 1 | 0 | 3  | 3 | (28.4%) |
| <b>Persistent LBP</b>                                                         |    |   |   |   |   |    |   |   |    |   |         |
| Arthritis Australia                                                           | 21 | 4 | 1 | 1 | 0 | 12 | 1 | 2 | 7  | 5 | (20.0%) |
| Australia Physiotherapy Association                                           | 8  | 3 | 0 | 4 | 0 | 0  | 0 | 1 | 8  | 7 | (28.0%) |
| Better Health (Victoria Government)                                           | 10 | 5 | 0 | 0 | 0 | 0  | 4 | 1 | 6  | 5 | (20.0%) |
| Choice                                                                        | 18 | 4 | 1 | 2 | 0 | 9  | 2 | 0 | 6  | 6 | (24.0%) |
| Healthy WA (Western Australia Government)                                     | 4  | 4 | 0 | 0 | 0 | 0  | 0 | 0 | 4  | 4 | (16.0%) |
| Musculoskeletal Australia                                                     | 2  | 1 | 0 | 0 | 0 | 0  | 1 | 0 | 1  | 1 | (4.0%)  |
| Institute of Health Economics (IHE)                                           | 38 | 9 | 5 | 4 | 3 | 11 | 3 | 3 | 16 | 3 | (52.0%) |
| Arthritis Research UK                                                         | 21 | 1 | 0 | 0 | 0 | 17 | 0 | 3 | 4  | 1 | (4.0%)  |
| East Lancashire                                                               | 6  | 3 | 1 | 0 | 0 | 0  | 1 | 1 | 4  | 3 | (12.0%) |
| Healthshare (Oxfordshire)                                                     | 16 | 4 | 2 | 0 | 0 | 5  | 4 | 1 | 5  | 4 | (16.0%) |
| Poole Hospital                                                                | 2  | 2 | 0 | 0 | 0 | 0  | 0 | 0 | 2  | 2 | (8.0%)  |
| Queen Victoria Hospital                                                       | 7  | 2 | 0 | 0 | 0 | 0  | 4 | 1 | 3  | 2 | (8.0%)  |
| Royal Berkshire Hospital                                                      | 15 | 5 | 5 | 0 | 0 | 3  | 1 | 1 | 6  | 5 | (20.0%) |

|                                                                               |    |   |   |   |   |    |   |   |    |   |         |
|-------------------------------------------------------------------------------|----|---|---|---|---|----|---|---|----|---|---------|
| Agency for Healthcare Research and Quality (AHRQ)                             | 13 | 8 | 2 | 1 | 0 | 0  | 2 | 0 | 9  | 9 | (36.0%) |
| American Chronic Pain Association                                             | 15 | 6 | 1 | 0 | 0 | 8  | 0 | 0 | 6  | 6 | (24.0%) |
| Cedars-Sinai                                                                  | 14 | 4 | 1 | 0 | 0 | 0  | 9 | 0 | 4  | 4 | (16.0%) |
| Cleveland Clinic                                                              | 7  | 3 | 3 | 0 | 0 | 0  | 1 | 0 | 3  | 3 | (12.0%) |
| Hospital for special surgery (HSS)                                            | 6  | 3 | 2 | 0 | 0 | 0  | 1 | 0 | 3  | 3 | (12.0%) |
| Johns Hopkins Medicine                                                        | 15 | 3 | 1 | 0 | 0 | 2  | 9 | 0 | 3  | 3 | (12.0%) |
| Mayo Clinic                                                                   | 13 | 0 | 1 | 0 | 0 | 12 | 0 | 0 | 0  | 0 | (0.0%)  |
| MedlinePLus                                                                   | 15 | 5 | 3 | 0 | 0 | 1  | 6 | 0 | 5  | 5 | (20.0%) |
| National Center for Complementary and Integrative Health (NCCIH)              | 7  | 4 | 1 | 0 | 0 | 1  | 1 | 0 | 4  | 4 | (16.0%) |
| National Institute of Arthritis and Musculoskeletal and Skin Diseases (NIAMS) | 20 | 4 | 3 | 0 | 0 | 4  | 9 | 0 | 4  | 4 | (16.0%) |
| National Institute of Neurological Disorders and Stroke (NINDS)               | 24 | 5 | 3 | 1 | 2 | 3  | 8 | 2 | 8  | 6 | (24.0%) |
| St Lukes                                                                      | 30 | 9 | 3 | 0 | 0 | 11 | 4 | 3 | 12 | 9 | (36.0%) |
| University of Florida Health                                                  | 16 | 5 | 4 | 0 | 0 | 0  | 6 | 1 | 6  | 5 | (20.0%) |
| University of Kansas                                                          | 10 | 4 | 2 | 0 | 0 | 3  | 1 | 0 | 4  | 4 | (16.0%) |
| University of Utah                                                            | 24 | 6 | 4 | 1 | 1 | 2  | 8 | 2 | 9  | 7 | (28.0%) |
| University of Winsconsin                                                      | 5  | 0 | 0 | 0 | 0 | 1  | 2 | 2 | 2  | 0 | (0.0%)  |
| <b><i>Radicular LBP</i></b>                                                   |    |   |   |   |   |    |   |   |    |   |         |
| Australia Pain Management Association                                         | 3  | 2 | 0 | 0 | 0 | 1  | 0 | 0 | 2  | 2 | (14.3%) |
| Australian Physiotherapy Association                                          | 8  | 2 | 0 | 2 | 1 | 1  | 1 | 1 | 5  | 4 | (28.6%) |
| Better Health (Victoria Government)                                           | 13 | 5 | 2 | 0 | 0 | 0  | 5 | 1 | 6  | 5 | (35.7%) |
| Health Direct                                                                 | 6  | 1 | 0 | 0 | 0 | 2  | 3 | 0 | 1  | 1 | (7.1%)  |
| South Australia Government                                                    | 3  | 2 | 0 | 0 | 0 | 0  | 0 | 1 | 3  | 2 | (14.3%) |
| Health Link - British Columbia                                                | 9  | 2 | 0 | 0 | 0 | 3  | 4 | 0 | 2  | 2 | (14.3%) |
| Arthritis Research UK                                                         | 6  | 4 | 0 | 0 | 0 | 0  | 2 | 0 | 4  | 4 | (28.6%) |
| Focus on disabiliy                                                            | 16 | 6 | 2 | 0 | 0 | 1  | 7 | 0 | 6  | 6 | (42.9%) |
| Guy's and Saint Thomas'                                                       | 1  | 1 | 0 | 0 | 0 | 0  | 0 | 0 | 1  | 1 | (7.1%)  |
| Healthshare (Oxfordshire)                                                     | 8  | 4 | 0 | 0 | 0 | 0  | 3 | 1 | 5  | 4 | (28.6%) |
| NHS Choices                                                                   | 10 | 3 | 0 | 0 | 0 | 0  | 5 | 2 | 5  | 3 | (21.4%) |
| NHS Direct - Wales                                                            | 20 | 8 | 3 | 0 | 0 | 0  | 8 | 1 | 9  | 8 | (57.1%) |
| Poole Hospital                                                                | 6  | 4 | 1 | 0 | 0 | 0  | 1 | 0 | 4  | 4 | (28.6%) |
| American Chronic Pain Association                                             | 4  | 4 | 0 | 0 | 0 | 0  | 0 | 0 | 4  | 4 | (28.6%) |
| American Physical Therapy Association (APTA)                                  | 7  | 2 | 1 | 0 | 0 | 0  | 3 | 1 | 3  | 2 | (14.3%) |
| Beaumont Hospital                                                             | 4  | 1 | 1 | 0 | 0 | 0  | 2 | 0 | 1  | 1 | (7.1%)  |
| Cedars-Sinai                                                                  | 5  | 2 | 1 | 0 | 0 | 0  | 2 | 0 | 2  | 2 | (14.3%) |
| Cleveland Clinic                                                              | 10 | 3 | 1 | 0 | 0 | 0  | 6 | 0 | 3  | 3 | (21.4%) |

|                                        |    |   |   |   |   |   |   |   |   |   |         |
|----------------------------------------|----|---|---|---|---|---|---|---|---|---|---------|
| Columbia Spine Hospital                | 5  | 2 | 0 | 0 | 0 | 1 | 2 | 0 | 2 | 2 | (14.3%) |
| El Camino Hospital                     | 3  | 0 | 1 | 0 | 0 | 1 | 1 | 0 | 0 | 0 | (0.0%)  |
| Emory Healthcare                       | 4  | 1 | 0 | 0 | 0 | 0 | 3 | 0 | 1 | 1 | (7.1%)  |
| Hospital for Special Surgery           | 5  | 1 | 0 | 0 | 1 | 0 | 3 | 0 | 1 | 1 | (7.1%)  |
| Mayo Clinic                            | 13 | 6 | 2 | 0 | 0 | 1 | 4 | 0 | 6 | 6 | (42.9%) |
| Mount Sinal Hospital                   | 4  | 2 | 0 | 0 | 0 | 0 | 2 | 0 | 2 | 2 | (14.3%) |
| New England Baptist Hospital           | 7  | 3 | 1 | 0 | 0 | 0 | 3 | 0 | 3 | 3 | (21.4%) |
| Oregon Health & Science University     | 6  | 0 | 0 | 0 | 0 | 0 | 6 | 0 | 0 | 0 | (0.0%)  |
| Penn University Hospital               | 9  | 1 | 0 | 0 | 0 | 4 | 3 | 1 | 2 | 1 | (7.1%)  |
| Rush University Medical Center         | 5  | 3 | 0 | 0 | 0 | 0 | 2 | 0 | 3 | 3 | (21.4%) |
| SSM Health                             | 4  | 0 | 1 | 0 | 0 | 0 | 3 | 0 | 0 | 0 | (0.0%)  |
| University of Miami Hospital           | 4  | 1 | 1 | 0 | 0 | 0 | 2 | 0 | 1 | 1 | (7.1%)  |
| University of Michigan                 | 8  | 2 | 1 | 0 | 0 | 1 | 4 | 0 | 2 | 2 | (14.3%) |
| University of Minnesota medical center | 6  | 0 | 2 | 0 | 0 | 2 | 2 | 0 | 0 | 0 | (0.0%)  |
| University of Rochester Medical Centre | 4  | 1 | 1 | 0 | 0 | 0 | 2 | 0 | 1 | 1 | (7.1%)  |
| University of Stanford Health          | 7  | 1 | 1 | 0 | 0 | 3 | 2 | 0 | 1 | 1 | (7.1%)  |
| University of Utah                     | 9  | 3 | 1 | 0 | 0 | 4 | 1 | 0 | 3 | 3 | (21.4%) |
| University of Vermont medical center   | 2  | 0 | 1 | 0 | 0 | 0 | 1 | 0 | 0 | 0 | (0.0%)  |
| University of Virginia                 | 9  | 2 | 1 | 0 | 0 | 0 | 6 | 0 | 2 | 2 | (14.3%) |
| University of Winsconsin               | 6  | 1 | 1 | 0 | 0 | 0 | 4 | 0 | 1 | 1 | (7.1%)  |
| Winchester Hospital                    | 12 | 0 | 1 | 0 | 0 | 3 | 0 | 8 | 8 | 0 | (0.0%)  |

BP, low back pain; AE, appropriate endorsement, AD, appropriate dismissal; IE, inappropriate endorsement, ID, inappropriate dismissal; UNC, unclear; END, endorsed; DIS, dismissed
